# Supplementary material for: On the mesoscale monitoring capability of Argo floats in the Mediterranean Sea
Source: Copernicus journal article supplement (doi:10.5194/os-13-223-2017), 2017-03-29
Supplement: Supplementary file 1 [file os-13-223-2017-supplement.pdf]

Supplement of Ocean Sci., 13, 223–234, 2017  
<http://www.ocean-sci.net/13/223/2017/>  
doi:10.5194/os-13-223-2017-supplement  
© Author(s) 2017. CC Attribution 3.0 License.

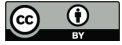

*Supplement of*

## **On the mesoscale monitoring capability of Argo floats in the Mediterranean Sea**

**Antonio Sánchez-Román et al.**

*Correspondence to:* Antonio Sánchez-Román ([asanchez@imedea.uib-csic.es](mailto:asanchez@imedea.uib-csic.es))

The copyright of individual parts of the supplement might differ from the CC-BY 3.0 licence.

|                         | <b>All valid profiles<br/>(DHA ref. 900 dbar)</b> |      | <b>Profiles reaching 900m<br/>(DHA ref. 400 dbar)</b> |      | <b>All valid profiles<br/>(DHA ref. 400 dbar)</b> |      |
|-------------------------|---------------------------------------------------|------|-------------------------------------------------------|------|---------------------------------------------------|------|
| <b>Argo Floats</b>      | 8                                                 |      | 11                                                    |      | 18                                                |      |
| <b>Argo Profiles</b>    | 109                                               |      | 165                                                   |      | 996                                               |      |
| <b>std (SLA-DHA,cm)</b> | 4.31                                              | 0.08 | 4.49                                                  | 0.09 | 4.85                                              | 0.07 |
| <b>R (SLA-DHA)</b>      | 0.90                                              | 0.02 | 0.86                                                  | 0.02 | 0.80                                              | 0.02 |

Table S1: Comparison of correlation and standard deviation (cm) of the differences between new AVISO product for the western Mediterranean and Argo data referred to both 400 dbar and 900 dbar (sub-columns on the left). Sub-columns on the right display the results of the robustness experiments in terms of standard deviations (see text for details). DHA referred to 400 dbar has been computed for the whole valid Argo profiles and those reaching 900 m depth for comparison purposes. The number of Argo platforms and vertical profiles used are also showed.

|                         | <b>All valid profiles<br/>(DHA ref. 900 dbar)</b> |      | <b>Profiles reaching 900m<br/>(DHA ref. 400 dbar)</b> |      | <b>All valid profiles<br/>(DHA ref. 400 dbar)</b> |      |
|-------------------------|---------------------------------------------------|------|-------------------------------------------------------|------|---------------------------------------------------|------|
| <b>Argo Floats</b>      | 15                                                |      | 16                                                    |      | 23                                                |      |
| <b>Argo Profiles</b>    | 307                                               |      | 314                                                   |      | 1262                                              |      |
| <b>std (SLA-DHA,cm)</b> | 5.54                                              | 0.09 | 5.21                                                  | 0.08 | 4.99                                              | 0.08 |
| <b>R (SLA-DHA)</b>      | 0.71                                              | 0.02 | 0.71                                                  | 0.02 | 0.70                                              | 0.02 |

Table S2: As Table S1 but for the eastern Mediterranean.
